# Supplementary material
Source: Springer Nature journal article supplement (https://www.springermedizin.de/resource/supplementary/12936_2006_331_MOESM6_ESM.pdf/9547566)

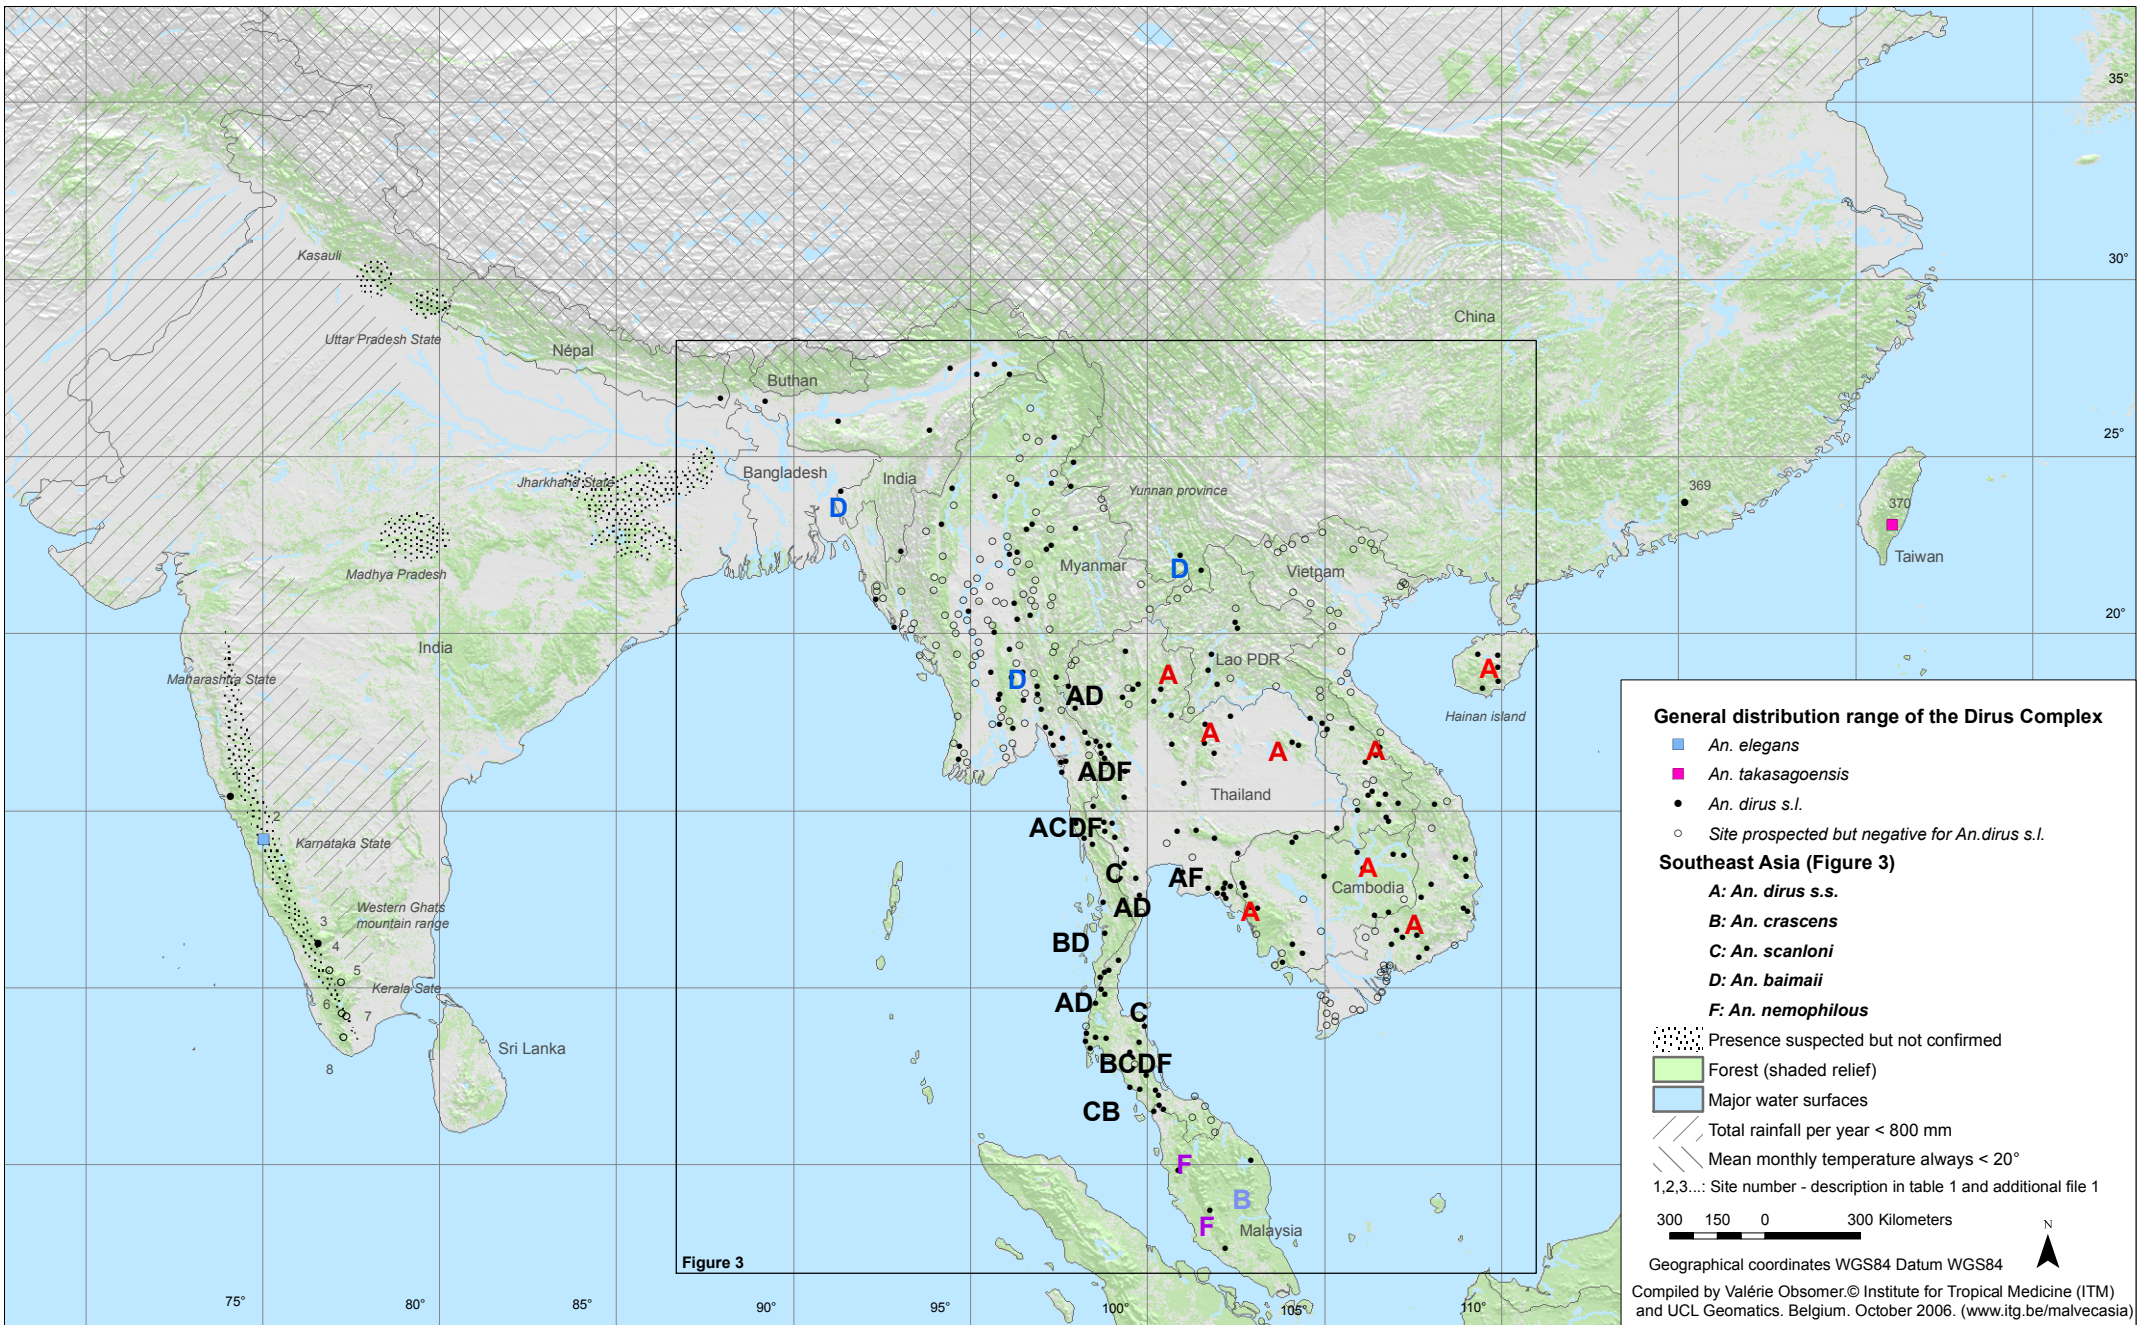

**Figure 3**

Supplement: MOESM6 [file 9547566]
